# Supplementary material
Source: PubMed Central journal article supplement (PMC4525935)
Supplement: ijcep0008-7083-f3.pdf [file ijcep0008-7083-f3.pdf]

## CYP3A4 polymorphisms in Uygur

**Table S1.** CYP3A4 primers and amplifications

| <i>Region</i> | <i>Primer pair</i> | <i>Primer sequence (5' to 3')</i> | <i>Len (bp)</i> | <i>GC (%)</i> | <i>Anneal temp</i> | <i>Fragment size (bp)</i> |
|---------------|--------------------|-----------------------------------|-----------------|---------------|--------------------|---------------------------|
| Promoter      | CYP3A4_P_F         | GTGCAGAGACAGCAGCTGAG              | 20              | 60.00         | 60.08              | 882                       |
|               | CYP3A4_P_R         | TCTCCTCTGAGTCTTCCTTTCA            | 22              | 45.45         | 45.45              |                           |
| Exon1         | CYP3A4_Exon1_F     | CTTCCAACCTGCAGGCAGAG              | 19              | 57.89         | 59.71              | 900                       |
|               | CYP3A4_Exon1_R     | GTTTGGAAATGAGATCCGTCA             | 20              | 45.00         | 58.49              |                           |
| Exon2         | CYP3A4_Exon2_F     | ATTCCTGCCTGAACCTCTCA              | 20              | 50.00         | 59.80              | 894                       |
|               | CYP3A4_Exon2_R     | GGTAAATACCTGGGCTCCCTA             | 21              | 52.38         | 59.34              |                           |
| Exon3         | CYP3A4_Exon3_F     | AAGGATGACAAAGAGATAAAACACTG        | 26              | 34.62         | 59.20              | 898                       |
|               | CYP3A4_Exon3_R     | AAGACTCCGCAAAACTACAAGC            | 22              | 45.45         | 59.95              |                           |
| Exon4         | CYP3A4_Exon4_F     | GGAGAATGGCATGGGAAATA              | 20              | 45.00         | 59.72              | 855                       |
|               | CYP3A4_Exon4_R     | CCACATGGAGACAGAGTGGA              | 20              | 55.00         | 59.66              |                           |
| Exon5         | CYP3A4_Exon5_6_F   | CGCCCCACACAAATACATC               | 19              | 52.63         | 59.79              | 871                       |
| Exon6         | CYP3A4_Exon5_6_R   | TGTGCACAGGGGAGAAGAT               | 19              | 52.63         | 59.20              |                           |
| Exon7         | CYP3A4_Exon7_F     | TGAGCCCCCTTAGGAAGAGTT             | 20              | 50.00         | 58.00              | 900                       |
|               | CYP3A4_Exon7_R     | GCAGAAGAAAGAAAATGATACAGAC         | 25              | 36.00         | 57.77              |                           |
| Exon8         | CYP3A4_Exon8_F     | TCTTGACTACCTACTATTTCTTGAACA       | 27              | 33.33         | 57.09              | 893                       |
|               | CYP3A4_Exon8_R     | TTGAAATGAGTCTTTACCAATTTATGA       | 27              | 25.93         | 59.41              |                           |
| Exon9         | CYP3A4_Exon9_F     | CCCTTCAATAAATTGTCAGAGGA           | 23              | 39.13         | 59.49              | 927                       |
|               | CYP3A4_Exon9_R     | GTGGCTCCTGATTGGATGTT              | 20              | 50.00         | 59.93              |                           |
| Exon10        | CYP3A4_Exon10_F    | ACATTTTTCTTGGGGGAGAG              | 20              | 45.00         | 58.09              | 928                       |
|               | CYP3A4_Exon10_R    | TAAGGGGACATCACACACCA              | 20              | 50.00         | 59.81              |                           |
| Exon11        | CYP3A4_Exon11_F    | CAAAAGTCCTCCTTTTAGTGTGTG          | 24              | 41.67         | 59.28              | 912                       |
|               | CYP3A4_Exon11_R    | AAAAATATTCATTTGGGGGACA            | 22              | 31.82         | 59.44              |                           |
| Exon12        | CYP3A4_Exon12_F    | TTCCCCTTCTCCTTCTCAT               | 20              | 50.00         | 60.01              | 928                       |
|               | CYP3A4_Exon12_R    | CCAAGTTCTGGTTGGGAAGA              | 20              | 50.00         | 60.08              |                           |
| Exon13        | CYP3A4_Exon13_F    | TTCAAAAACAGTTTGCCATCA             | 21              | 33.33         | 59.19              | 935                       |
|               | CYP3A4_Exon13_R    | GAATACTCCAGAGAAAACATGTGA          | 24              | 37.50         | 57.73              |                           |
| 3'UTR         | CYP3A4_3'-UTR_F    | TTGGCTCCTCTGCTTCTCAC              | 20              | 55.00         | 60.68              | 880                       |
|               | CYP3A4_3'-UTR_R    | TTGGGTGTTGAGGATGGAAT              | 20              | 45.00         | 60.17              |                           |
